# Supplementary material
Source: publisher figshare collection journal article supplement (https://acs.figshare.com/ndownloader/files/22778879)
Supplement: Supplementary file 1 [file 22778879]

# Finding Maximum Common Subgraph from Molecular Structural Formulas through Maximum Clique Approach Combined with Ising Model

Yasuharu Okamoto

## Supporting Information

**Figure S1:** Structural formula of laninamivir octanoate and oseltamivir (top panel), laninamivir octanoate and peramivir (middle panel), and oseltamivir and peramivir (bottom panel). In each panel, the corresponding substructures in the MCS are distinguished by different colors.

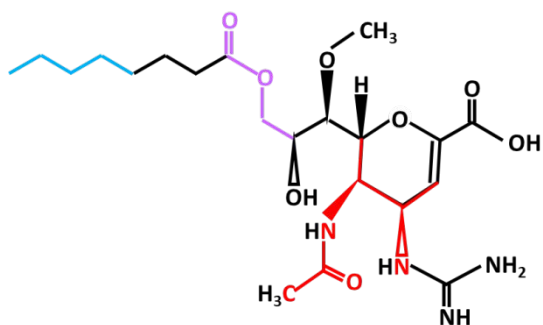

laninamivir octanoate

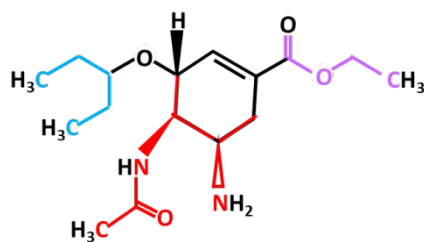

oseltamivir

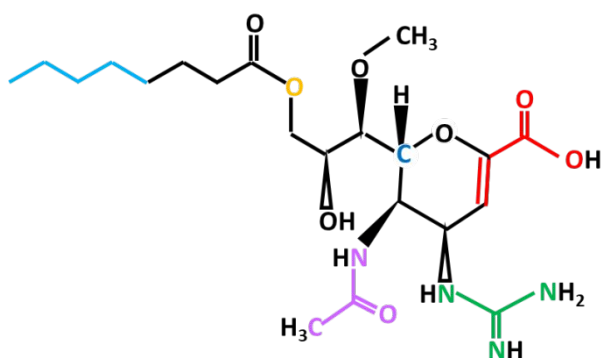

laninamivir octanoate

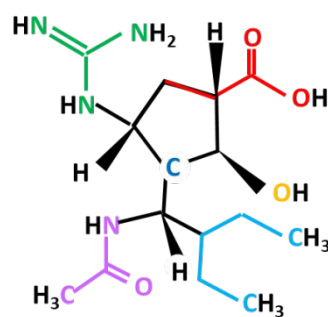

peramivir

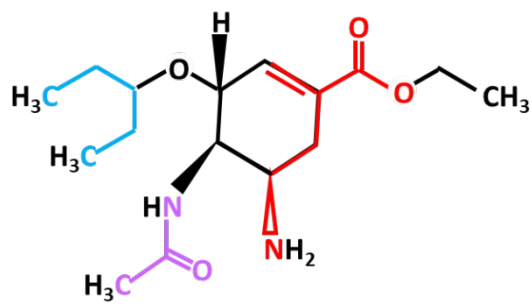

oseltamivir

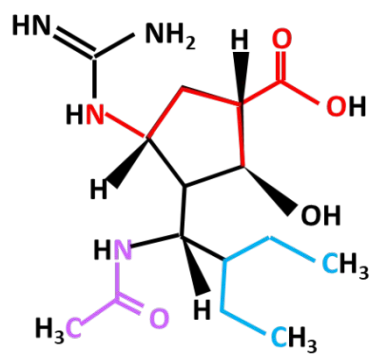

peramivir
